# Supplementary material
Source: publisher figshare collection journal article supplement (https://tandf.figshare.com/ndownloader/files/12844211)
Supplement: Supplementary file 1 [file 12844211]

**Supplementary information**

Appendix A.Factorial ANOVA scores for germination rate (using temperature and exposure time as independent variables) as Kruskal-Wallis scores for mean germination time, for both temperature and exposure time . Tests performed for a set of six native Cerrado grass species and four invasive species (*).*df* = degrees of freedom; *S =* sum of squares; *M* = mean of squares.

|  |  |  |  |  |  |  |  |  |  | |  | |
| --- | --- | --- | --- | --- | --- | --- | --- | --- | --- | --- | --- | --- |
|  |  | 2-factor ANOVA | | | | |  | Kruskal-Wallis | | | | | |
|  |  | Germination | | | | |  | Mean germination time | | | | | |
| Species | Variables | *df* | *S* | *M* | F | P |  | df | H | P | |
| *Andropogon gayanus** | temperature | 6 | 28.120 | 0.47 | 203.14 | <0.001 |  | 6 | 24.48 | <0.001 | |
| time | 1 | 0.01 | 0.01 | 2.63 | 0.112 |  | 1 | 2.70 | 0.259 | |
| temperature × time | 6 | 0.04 | 0.01 | 2.84 | 0.021 |  | - | - | - | |
| residuals | 42 | 0.10 | 0.00 | - | - |  | - | - | - | |
| *Hyparrhenia rufa ** | temperature | 6 | 10.59 | 1.76 | 116.94 | <0.001 |  | 6 | 11.143 | <0.001 | |
| time | 1 | 0.03 | 0.02 | 1.91 | 0.174 |  | 1 | 2.70 | 0.548 | |
| temperature × time | 6 | 0.07 | 0.01 | 0.77 | 0.597 |  | - | - | - | |
| residuals | 42 | 0.63 | 0.02 | - | - |  | - | - | - | |
| *Melinis minutiflora** | temperature | 6 | 1.19 | 0.20 | 44.27 | <0.001 |  | 6 | 28.53 | <0.001 | |
| time | 1 | 0.02 | 0.02 | 3.45 | 0.070 |  | 1 | 0.105 | 0.746 | |
| temperature × time | 6 | 0.05 | 0.01 | 1.94 | 0.096 |  | - | - | - | |
| residuals | 42 | 0.19 | 0.00 |  |  |  | - | - | - | |
| *Urochloa decumbens** | temperature | 6 | 5.03 | 0.84 | 920.07 | <0.001 |  | 6 | 12.57 | 0.006 | |
| time | 1 | 0.01 | 0.01 | 6.89 | 0.121 |  | 1 | 1.46 | 0.226 | |
| temperature × time | 6 | 0.04 | 0.01 | 8.24 | <0.001 |  | - | - | - | |
| residuals | 42 | 0.04 | 0.00 | - | - |  | - | - | - | |
| *Echinolaena inflexa* | temperature | 6 | 0.44 | 0.07 | 6.47 | <0.001 |  | 6 | 15.81 | 0.001 | |
| time | 1 | 0.00 | 0.00 | 0.26 | 0.610 |  | 1 | 0.01 | 0.920 | |
| temperature × time | 6 | 0.01 | 0.00 | 0.10 | 0.996 |  | - | - | - | |
| residuals | 42 | 0.48 | 0.13 | - | - |  | - | - | - | |
| *Paspalum gardnerianum* | temperature | 6 | 1840.40 | 306.7 | 83.18 | <0.001 |  | 6 | 2.55 | 0.636 | |
| time | 1 | 2.51 | 2.51 | 0.68 | 0.414 |  | 1 | 0.35 | 0.555 | |
| temperature × time | 6 | 13.00 | 2.17 | 0.59 | 0.738 |  | - | - | - | |
| residuals | 42 | 154.90 | 3.69 | - | - |  | - | - | - | |
| *Paspalum reduncum* | temperature | 6 | 11.74 | 1.96 | 30.32 | <0.001 |  | 6 | 15.26 | 0.004 | |
| time | 1 | 0.22 | 0.23 | 3.48 | 0.086 |  | 1 | 1.08 | 0.299 | |
| temperature × time | 6 | 0.78 | 0.13 | 2.01 | 0.086 |  | - | - | - | |
| residuals | 42 | 2.71 | 0.06 | - | - |  | - | - | - | |
| *Paspalum stellatum* | temperature | 6 | 7.25 | 1.21 | 143.91 | <0.001 |  | 6 | 4.52 | 0.340 | |
| time | 1 | 0.00 | 0.00 | 0.02 | 0.887 |  | 1 | 3.72 | 0.053 | |
| temperature × time | 6 | 0.03 | 0.00 | 1.52 | 0.792 |  | - | - | - | |
| residuals | 42 | 0.35 | 0.01 |  |  |  | - | - | - | |
| *Paspalum trachycoleon* | temperature | 6 | 7.89 | 1.32 | 47.12 | <0.001 |  | 6 | 26.32 | <0.001 | |
| time | 1 | 0.00 | 0.00 | 0.03 | 0.863 |  | 1 | 0.79 | 0.376 | |
| temperature × time | 6 | 0.12 | 0.02 | 0.69 | 0.662 |  | - | - | - | |
| residuals | 42 | 1.17 | 0.03 | - | - |  | - | - | - | |
| *Schizachyrium sanguineum* | temperature | 6 | 20.43 | 3.40 | 226.30 | <0.001 |  | 6 | 28.78 | <0.001 | |
| time | 1 | 0.00 | 0.00 | 0.01 | 0.926 |  | 1 | 0.89 | 0.346 | |
| temperature × time | 6 | 0.05 | 0.01 | 0.51 | 0.796 |  | - | - | - | |
| residuals | 42 | 0.63 | 0.02 | - | - |  | - | - | - | |
